# Supplementary material
Source: ML conference proceedings conference paper supplement (https://openaccess.thecvf.com/content/ICCV2021/html/Zhang_VidTr_Video_Transformer_ICCV_2021_paper.html)
Supplement: Supplementary file 2 [file Zhang_VidTr_Video_Transformer_ICCV_2021_supplemental.zip]

Archive with 1 entries (1 files):
- 06737-supp-min.pdf
